# Supplementary material for: Spatio-Temporal Dynamic of Tuber magnatum Mycelium in Natural Truffle Grounds
Source: PLoS One. 2014 Dec 23;9(12):e115921. doi: 10.1371/journal.pone.0115921 (PMC4275250; doi:10.1371/journal.pone.0115921)
Supplement: S1 File — Datasets used for statistical analyses. (XLSX) [file pone.0115921.s005.xlsx]

## Sheet: season Feudozzo
Sample	distance	season	Truffle ground	ug mycelium/g soil	log(x+1)
A10PA2	0 cm	2010-11-01	Feudozzo	1.63505	0.420789
A10PA2	100 cm	2010-11-01	Feudozzo	0.59119	0.201722
A10PA2	200 cm	2010-11-01	Feudozzo	0.473803	0.168439
A11PA1	0 cm	2010-11-01	Feudozzo	0.349087	0.13004
A11PA1	100 cm	2010-11-01	Feudozzo	0.440864	0.158623
A11PA1	200 cm	2010-11-01	Feudozzo	0.434471	0.156692
A12PC4	0 cm	2010-11-01	Feudozzo	0.007852	0.00339676
A12PC4	100 cm	2010-11-01	Feudozzo	0.007852	0.00339676
A12PC4	200 cm	2010-11-01	Feudozzo	0.184038	0.0733656
A13PB1	0 cm	2010-11-01	Feudozzo	0.722999	0.236285
A13PB1	100 cm	2010-11-01	Feudozzo	0.755546	0.244412
A13PB1	200 cm	2010-11-01	Feudozzo	0.674186	0.223804
A4PC3	0 cm	2010-11-01	Feudozzo	0.007852	0.00339676
A4PC3	100 cm	2010-11-01	Feudozzo	8.12682	0.960319
A4PC3	200 cm	2010-11-01	Feudozzo	37.5326	1.58583
A5PC3	0 cm	2010-11-01	Feudozzo	43.6323	1.64965
A5PC3	100 cm	2010-11-01	Feudozzo	15.297	1.21211
A5PC3	200 cm	2010-11-01	Feudozzo	7.09965	0.908466
A6PC4	0 cm	2010-11-01	Feudozzo	2.43059	0.535368
A6PC4	100 cm	2010-11-01	Feudozzo	1.779	0.443889
A6PC4	200 cm	2010-11-01	Feudozzo	1.24768	0.351735
A10PA2	0 cm	2010-04-01	Feudozzo	1.35185	0.37141
A10PA2	100 cm	2010-04-01	Feudozzo	2.40468	0.532076
A10PA2	200 cm	2010-04-01	Feudozzo	1.63714	0.421134
A11PA1	0 cm	2010-04-01	Feudozzo	9.2261	1.00971
A11PA1	100 cm	2010-04-01	Feudozzo	4.01355	0.700145
A11PA1	200 cm	2010-04-01	Feudozzo	8.88145	0.994821
A12PC4	0 cm	2010-04-01	Feudozzo	9.4224	1.01797
A12PC4	100 cm	2010-04-01	Feudozzo	1.39839	0.37992
A12PC4	200 cm	2010-04-01	Feudozzo	2.50165	0.544272
A13PB1	0 cm	2010-04-01	Feudozzo	2.674	0.565139
A13PB1	100 cm	2010-04-01	Feudozzo	7.18916	0.913239
A13PB1	200 cm	2010-04-01	Feudozzo	1.3531	0.37164
A4PC3	0 cm	2010-04-01	Feudozzo	97.5768	1.99377
A4PC3	100 cm	2010-04-01	Feudozzo	47.2612	1.6836
A4PC3	200 cm	2010-04-01	Feudozzo	33.8264	1.54191
A5PC3	0 cm	2010-04-01	Feudozzo	76.4301	1.88891
A5PC3	100 cm	2010-04-01	Feudozzo	28.9875	1.47694
A5PC3	200 cm	2010-04-01	Feudozzo	13.873	1.1724
A6PC4	0 cm	2010-04-01	Feudozzo	7.11823	0.909461
A6PC4	100 cm	2010-04-01	Feudozzo	1.65147	0.423487
A6PC4	200 cm	2010-04-01	Feudozzo	2.63513	0.56052
A10PA2	0 cm	jul-10	Feudozzo	0.788341	0.25245
A10PA2	100 cm	jul-10	Feudozzo	1.01844	0.305017
A10PA2	200 cm	jul-10	Feudozzo	0.863772	0.270393
A11PA1	0 cm	jul-10	Feudozzo	0.502201	0.176728
A11PA1	100 cm	jul-10	Feudozzo	1.2838	0.358658
A11PA1	200 cm	jul-10	Feudozzo	0.447001	0.160469
A12PC4	0 cm	jul-10	Feudozzo	0.435786	0.15709
A12PC4	100 cm	jul-10	Feudozzo	0.327167	0.122925
A12PC4	200 cm	jul-10	Feudozzo	0.21593	0.0849086
A13PB1	0 cm	jul-10	Feudozzo	1.62392	0.418951
A13PB1	100 cm	jul-10	Feudozzo	2.95248	0.59687
A13PB1	200 cm	jul-10	Feudozzo	1.24503	0.351221
A4PC3	0 cm	jul-10	Feudozzo	0.400452	0.146268
A4PC3	100 cm	jul-10	Feudozzo	0.007852	0.00339676
A4PC3	200 cm	jul-10	Feudozzo	13.9294	1.17404
A5PC3	0 cm	jul-10	Feudozzo	0.527196	0.183895
A5PC3	100 cm	jul-10	Feudozzo	0.661439	0.220485
A5PC3	200 cm	jul-10	Feudozzo	0.31692	0.119559
A6PC4	0 cm	jul-10	Feudozzo	1.988	0.47538
A6PC4	100 cm	jul-10	Feudozzo	2.00933	0.478469
A6PC4	200 cm	jul-10	Feudozzo	3.21251	0.624541
A10PA2	0 cm	FS-09	Feudozzo	1.05858	0.313568
A10PA2	100 cm	FS-09	Feudozzo	0.498942	0.175785
A10PA2	200 cm	FS-09	Feudozzo	0.359936	0.133518
A11PA1	0 cm	FS-09	Feudozzo	0.100711	0.0416733
A11PA1	100 cm	FS-09	Feudozzo	0.440052	0.158378
A11PA1	200 cm	FS-09	Feudozzo	0.007852	0.00339676
A12PC4	0 cm	FS-09	Feudozzo	0.379513	0.139726
A12PC4	100 cm	FS-09	Feudozzo	0.007852	0.00339676
A12PC4	200 cm	FS-09	Feudozzo	0.007852	0.00339676
A13PB1	0 cm	FS-09	Feudozzo	4.33209	0.726898
A13PB1	100 cm	FS-09	Feudozzo	0.954803	0.291103
A13PB1	200 cm	FS-09	Feudozzo	0.827509	0.26186
A4PC3	0 cm	FS-09	Feudozzo	6.39938	0.869195
A4PC3	100 cm	FS-09	Feudozzo	1.64892	0.423069
A4PC3	200 cm	FS-09	Feudozzo	6.16382	0.855145
A5PC3	0 cm	FS-09	Feudozzo	35.0513	1.55692
A5PC3	100 cm	FS-09	Feudozzo	16.1673	1.2347
A5PC3	200 cm	FS-09	Feudozzo	12.2243	1.12137
A6PC4	0 cm	FS-09	Feudozzo	0.446164	0.160217
A6PC4	100 cm	FS-09	Feudozzo	1.42802	0.385252
A6PC4	200 cm	FS-09	Feudozzo	0.617115	0.208741

## Sheet: season Argenta
Sample	distance	season	Truffle ground	ug mycelium/g soil	log(x+1)
E1P2	0 cm	2009-11-01	Argenta	3.044	0.606811
E2P2	0 cm	2009-11-01	Argenta	0.092	0.0382226
E4P7	0 cm	2009-11-01	Argenta	nd	nd
E5P6	0 cm	2009-11-01	Argenta	3.71516	0.673497
E6P6	0 cm	2009-11-01	Argenta	0.158787	0.0640037
E7P7	0 cm	2009-11-01	Argenta	0.328182	0.123258
E8P6	0 cm	2009-11-01	Argenta	3.39462	0.642921
E1P2	100 cm	2009-11-01	Argenta	4.93	0.773055
E2P2	100 cm	2009-11-01	Argenta	8.225	0.964966
E4P7	100 cm	2009-11-01	Argenta	0.433758	0.156476
E5P6	100 cm	2009-11-01	Argenta	4.73341	0.758413
E6P6	100 cm	2009-11-01	Argenta	1.16806	0.336071
E7P7	100 cm	2009-11-01	Argenta	0.068724	0.0288656
E8P6	100 cm	2009-11-01	Argenta	10.2895	1.05268
E1P2	200 cm	2009-11-01	Argenta	0.0276	0.0118241
E2P2	200 cm	2009-11-01	Argenta	0.0106	0.00457929
E4P7	200 cm	2009-11-01	Argenta	1.2191	0.346178
E5P6	200 cm	2009-11-01	Argenta	2.19917	0.505037
E6P6	200 cm	2009-11-01	Argenta	2.0574	0.485353
E7P7	200 cm	2009-11-01	Argenta	0.091134	0.0378781
E8P6	200 cm	2009-11-01	Argenta	10.3327	1.05433
E1P2	0 cm	2009-04-01	Argenta	0.00029	0.000125927
E2P2	0 cm	2009-04-01	Argenta	0.00013428	5.83131e-05
E4P7	0 cm	2009-04-01	Argenta	0.080676	0.0336955
E5P6	0 cm	2009-04-01	Argenta	7.74307	0.941664
E6P6	0 cm	2009-04-01	Argenta	0.244916	0.0951402
E7P7	0 cm	2009-04-01	Argenta	0.06723	0.028258
E8P6	0 cm	2009-04-01	Argenta	5.34155	0.802195
E1P2	100 cm	2009-04-01	Argenta	8.32	0.969416
E2P2	100 cm	2009-04-01	Argenta	7.3554	0.921967
E4P7	100 cm	2009-04-01	Argenta	0.171312	0.0686726
E5P6	100 cm	2009-04-01	Argenta	9.28621	1.01226
E6P6	100 cm	2009-04-01	Argenta	1.65037	0.423307
E7P7	100 cm	2009-04-01	Argenta	0.026852	0.0115079
E8P6	100 cm	2009-04-01	Argenta	5.10171	0.785452
E1P2	200 cm	2009-04-01	Argenta	0.000156	6.77447e-05
E2P2	200 cm	2009-04-01	Argenta	0.00013	5.64546e-05
E4P7	200 cm	2009-04-01	Argenta	1.18823	0.340093
E5P6	200 cm	2009-04-01	Argenta	5.4287	0.808123
E6P6	200 cm	2009-04-01	Argenta	1.24351	0.350927
E7P7	200 cm	2009-04-01	Argenta	0.000498	0.000216225
E8P6	200 cm	2009-04-01	Argenta	2.88641	0.589548
E1P2	0 cm	Jul-2009	Argenta	1.21113	0.344614
E2P2	0 cm	Jul-2009	Argenta	0.014	0.00603795
E4P7	0 cm	Jul-2009	Argenta	0.000498	0.000216225
E6P6	0 cm	Jul-2009	Argenta	0.043326	0.01842
E7P7	0 cm	Jul-2009	Argenta	0.764928	0.246727
E8P6	0 cm	Jul-2009	Argenta	0.493518	0.17421
E5P6	0 cm	Jul-2009	Argenta	1.256	0.353339
E1P2	100 cm	Jul-2009	Argenta	0.0206	0.00885556
E2P2	100 cm	Jul-2009	Argenta	0.00011	4.77698e-05
E4P7	100 cm	Jul-2009	Argenta	0.000498	0.000216225
E6P6	100 cm	Jul-2009	Argenta	0.408858	0.148867
E7P7	100 cm	Jul-2009	Argenta	0.041832	0.0177977
E8P6	100 cm	Jul-2009	Argenta	0.207666	0.0819468
E5P6	100 cm	Jul-2009	Argenta	0.000321	0.000139386
E1P2	200 cm	Jul-2009	Argenta	0.8	0.255273
E2P2	200 cm	Jul-2009	Argenta	1.06577	0.315082
E4P7	200 cm	Jul-2009	Argenta	0.549294	0.190134
E6P6	200 cm	Jul-2009	Argenta	0.036852	0.0157168
E7P7	200 cm	Jul-2009	Argenta	1.0946	0.321102
E8P6	200 cm	Jul-2009	Argenta	0.020916	0.00899001
E5P6	200 cm	Jul-2009	Argenta	1.056	0.313023
E1P2	0 cm	FS-2008	Argenta	4.23	0.718502
E2P2	0 cm	FS-2008	Argenta	0.92877	0.28528
E4P7	0 cm	FS-2008	Argenta	0.04482	0.0190415
E5P6	0 cm	FS-2008	Argenta	4.43934	0.735546
E6P6	0 cm	FS-2008	Argenta	0.410352	0.149328
E7P7	0 cm	FS-2008	Argenta	0.020916	0.00899001
E8P6	0 cm	FS-2008	Argenta	7.69161	0.9391
E1P2	100 cm	FS-2008	Argenta	0.9556	0.29128
E2P2	100 cm	FS-2008	Argenta	0.147906	0.0599063
E4P7	100 cm	FS-2008	Argenta	0.014442	0.00622722
E5P6	100 cm	FS-2008	Argenta	2.93048	0.594446
E6P6	100 cm	FS-2008	Argenta	0.249498	0.0967356
E7P7	100 cm	FS-2008	Argenta	0.04482	0.0190415
E8P6	100 cm	FS-2008	Argenta	3.89735	0.689961
E1P2	200 cm	FS-2008	Argenta	0.742	0.241048
E2P2	200 cm	FS-2008	Argenta	0.000498	0.000216225
E4P7	200 cm	FS-2008	Argenta	0.000498	0.000216225
E5P6	200 cm	FS-2008	Argenta	1.48246	0.394883
E6P6	200 cm	FS-2008	Argenta	1.06871	0.315699
E7P7	200 cm	FS-2008	Argenta	0.000498	0.000216225
E8P6	200 cm	FS-2008	Argenta	0.015936	0.00686635

## Sheet: Spatial
sample	distance	Truffle ground	ug mycelium/g soil	log(x+1)	Year
A1PB1	0 cm	Feudozzo	25.9116	1.42994	2008
A2PB1	0 cm	Feudozzo	0.703	0.231215	2008
A10PA2	0 cm	Feudozzo	1.05858	0.313568	2009
A11PA1	0 cm	Feudozzo	0.100711	0.0416733	2009
A12PC4	0 cm	Feudozzo	0.379513	0.139726	2009
A13PB1	0 cm	Feudozzo	4.33209	0.726898	2009
A4PC3	0 cm	Feudozzo	6.39938	0.869195	2009
A5PC3	0 cm	Feudozzo	35.0513	1.55692	2009
A6PC4	0 cm	Feudozzo	0.446164	0.160217	2009
A14PA2	0 cm	Feudozzo	0.463268	0.165324	2010
A15PB1	0 cm	Feudozzo	0.973648	0.29527	2010
A18PC1	0 cm	Feudozzo	0.502528	0.176823	2010
E1P2	0 cm	Argenta	4.23	0.718502	2008
E4P7	0 cm	Argenta	0.04482	0.0190415	2008
E5P6	0 cm	Argenta	4.43934	0.735546	2008
E6P6	0 cm	Argenta	0.410352	0.149328	2008
E7P7	0 cm	Argenta	0.020916	0.00899001	2008
E8P6	0 cm	Argenta	7.69161	0.9391	2008
E10P6	0 cm	Argenta	0.282864	0.108181	2009
E9P2	0 cm	Argenta	0.176292	0.0705151	2009
E11P4	0 cm	Argenta	0.333162	0.124883	2010
E12P4	0 cm	Argenta	0.213642	0.0840906	2010
E13P4	0 cm	Argenta	2.62795	0.559661	2010
E14P4	0 cm	Argenta	24.0947	1.39958	2010
E15P6	0 cm	Argenta	9.77972	1.03261	2010
E2P2	0 cm	Argenta	0.92877	0.28528	2008
M1PC2	0 cm	Collemeluccio	4.47663	0.738513	2008
M2PC2	0 cm	Collemeluccio	0.33966	0.126995	2008
M4PC2	0 cm	Collemeluccio	19.3614	1.30881	2009
M5PC2	0 cm	Collemeluccio	0.13209	0.053881	2009
M8PC2	0 cm	Collemeluccio	9.751	1.03145	2009
M13PC2	0 cm	Collemeluccio	1.98468	0.474898	2010
M17PC2	0 cm	Collemeluccio	0.527	0.183839	2010
T18P5	0 cm	Barbialla	9.63468	1.02672	2008
T20P2	0 cm	Barbialla	2.10259	0.491725	2008
T5P4	0 cm	Barbialla	0.069142	0.0290354	2008
T6P5	0 cm	Barbialla	7.2282	0.915305	2008
T7P7	0 cm	Barbialla	2.47097	0.54045	2008
T2P7	0 cm	Barbialla	0.312	0.117934	2008
T1P8	0 cm	Barbialla	0.041	0.0174507	2008
T12P2	0 cm	Barbialla	12.803	1.13997	2008
T13P8	0 cm	Barbialla	15.281	1.21168	2008
T21P4	0 cm	Barbialla	3.05218	0.607689	2009
T22P8	0 cm	Barbialla	0.067232	0.0282588	2009
T23P8	0 cm	Barbialla	0.338834	0.126727	2009
T24P3	0 cm	Barbialla	2.39208	0.530467	2010
T25P3	0 cm	Barbialla	13.1267	1.15004	2010
T26P7	0 cm	Barbialla	1.25143	0.352459	2010
T27P5	0 cm	Barbialla	10.4637	1.05933	2010
A1PB1	100 cm	Feudozzo	0.007852	0.00339676	2008
A2PB1	100 cm	Feudozzo	2.915	0.592732	2008
A10PA2	100 cm	Feudozzo	0.498942	0.175785	2009
A11PA1	100 cm	Feudozzo	0.440052	0.158378	2009
A12PC4	100 cm	Feudozzo	0.007852	0.00339676	2009
A13PB1	100 cm	Feudozzo	0.954803	0.291103	2009
A4PC3	100 cm	Feudozzo	1.64892	0.423069	2009
A5PC3	100 cm	Feudozzo	16.1673	1.2347	2009
A6PC4	100 cm	Feudozzo	1.42802	0.385252	2009
A14PA2	100 cm	Feudozzo	0.455416	0.162987	2010
A15PB1	100 cm	Feudozzo	0.1963	0.0778401	2010
A18PC1	100 cm	Feudozzo	0.27482	0.105449	2010
E1P2	100 cm	Argenta	0.9556	0.29128	2008
E4P7	100 cm	Argenta	0.014442	0.00622722	2008
E5P6	100 cm	Argenta	2.93048	0.594446	2008
E6P6	100 cm	Argenta	0.249498	0.0967356	2008
E7P7	100 cm	Argenta	0.04482	0.0190415	2008
E8P6	100 cm	Argenta	3.89735	0.689961	2008
E10P6	100 cm	Argenta	0.157368	0.0634715	2009
E9P2	100 cm	Argenta	0.038346	0.0163421	2009
E11P4	100 cm	Argenta	0.000498	0.000216225	2010
E12P4	100 cm	Argenta	0.267924	0.103093	2010
E13P4	100 cm	Argenta	0.000498	0.000216225	2010
E14P4	100 cm	Argenta	0.240036	0.0934343	2010
E15P6	100 cm	Argenta	0.499992	0.176089	2010
E2P2	100 cm	Argenta	0.147906	0.0599063	2008
M1PC2	100 cm	Collemeluccio	0.36963	0.136603	2008
M2PC2	100 cm	Collemeluccio	0.1443	0.0585399	2008
M4PC2	100 cm	Collemeluccio	1.33705	0.368668	2009
M5PC2	100 cm	Collemeluccio	0.16317	0.0656432	2009
M8PC2	100 cm	Collemeluccio	0.142	0.0576661	2009
M13PC2	100 cm	Collemeluccio	0.18537	0.0738539	2010
M17PC2	100 cm	Collemeluccio	5.719	0.827305	2010
T18P5	100 cm	Barbialla	5.23104	0.794561	2008
T20P2	100 cm	Barbialla	2.23476	0.509843	2008
T5P4	100 cm	Barbialla	0.004584	0.00198626	2008
T6P5	100 cm	Barbialla	0.728856	0.237759	2008
T7P7	100 cm	Barbialla	2.23986	0.510526	2008
T2P7	100 cm	Barbialla	0.132	0.0538464	2008
T1P8	100 cm	Barbialla	0.412	0.149835	2008
T12P2	100 cm	Barbialla	0.043	0.0182843	2008
T13P8	100 cm	Barbialla	0.051	0.0216027	2008
T21P4	100 cm	Barbialla	0.170372	0.0683239	2009
T22P8	100 cm	Barbialla	0.096264	0.0399152	2009
T23P8	100 cm	Barbialla	0.760944	0.245746	2009
T24P3	100 cm	Barbialla	0.038964	0.0166005	2010
T25P3	100 cm	Barbialla	0.033616	0.0143592	2010
T26P7	100 cm	Barbialla	1.12843	0.328059	2010
T27P5	100 cm	Barbialla	2.84896	0.585343	2010
A1PB1	200 cm	Feudozzo	0.494676	0.174547	2008
A2PB1	200 cm	Feudozzo	0.061	0.0257154	2008
A10PA2	200 cm	Feudozzo	0.359936	0.133518	2009
A11PA1	200 cm	Feudozzo	0.007852	0.00339676	2009
A12PC4	200 cm	Feudozzo	0.007852	0.00339676	2009
A13PB1	200 cm	Feudozzo	0.827509	0.26186	2009
A4PC3	200 cm	Feudozzo	6.16382	0.855145	2009
A5PC3	200 cm	Feudozzo	12.2243	1.12137	2009
A6PC4	200 cm	Feudozzo	0.617115	0.208741	2009
A14PA2	200 cm	Feudozzo	0.007852	0.00339676	2010
A15PB1	200 cm	Feudozzo	0.125632	0.0513964	2010
A18PC1	200 cm	Feudozzo	0.007852	0.00339676	2010
E1P2	200 cm	Argenta	0.742	0.241048	2008
E4P7	200 cm	Argenta	0.000498	0.000216225	2008
E5P6	200 cm	Argenta	1.48246	0.394883	2008
E6P6	200 cm	Argenta	1.06871	0.315699	2008
E7P7	200 cm	Argenta	0.000498	0.000216225	2008
E8P6	200 cm	Argenta	0.015936	0.00686635	2008
E10P6	200 cm	Argenta	0.118026	0.0484519	2009
E9P2	200 cm	Argenta	0.061254	0.0258193	2009
E11P4	200 cm	Argenta	0.018426	0.00792948	2010
E12P4	200 cm	Argenta	0.20667	0.0815885	2010
E13P4	200 cm	Argenta	0.021414	0.00920181	2010
E14P4	200 cm	Argenta	2.25096	0.512012	2010
E15P6	200 cm	Argenta	0.157866	0.0636583	2010
E2P2	200 cm	Argenta	0.000498	0.000216225	2008
M1PC2	200 cm	Collemeluccio	1.10001	0.322221	2008
M2PC2	200 cm	Collemeluccio	0.0888	0.0369481	2008
M4PC2	200 cm	Collemeluccio	0.545843	0.189165	2009
M5PC2	200 cm	Collemeluccio	0.06993	0.0293554	2009
M8PC2	200 cm	Collemeluccio	0.023	0.00987563	2009
M13PC2	200 cm	Collemeluccio	0.00111	0.0004818	2010
M17PC2	200 cm	Collemeluccio	0.035	0.0149403	2010
T18P5	200 cm	Barbialla	1.63267	0.420396	2008
T20P2	200 cm	Barbialla	0.443502	0.159417	2008
T5P4	200 cm	Barbialla	0.004966	0.00215137	2008
T6P5	200 cm	Barbialla	0.186416	0.074237	2008
T7P7	200 cm	Barbialla	0.000382	0.000165869	2008
T2P7	200 cm	Barbialla	3.895	0.689753	2008
T1P8	200 cm	Barbialla	0.018	0.00774778	2008
T12P2	200 cm	Barbialla	2.285	0.516535	2008
T13P8	200 cm	Barbialla	0.025	0.0107239	2008
T21P4	200 cm	Barbialla	0.380854	0.140148	2009
T22P8	200 cm	Barbialla	0.085568	0.035657	2009
T23P8	200 cm	Barbialla	0.308274	0.116699	2009
T24P3	200 cm	Barbialla	0.095882	0.0397638	2010
T25P3	200 cm	Barbialla	0.522194	0.18247	2010
T26P7	200 cm	Barbialla	0.093972	0.0390062	2010
T27P5	200 cm	Barbialla	0.829704	0.262381	2010
